# Supplementary material
Source: publisher site journal article supplement (https://www.spandidos-publications.com/789/downloadSupplementary)

Figure S1. Relative mRNA expression of MIP-2, KC and MCP-5 at 3 and 6 h after LPS treatment. RAW264.7 macrophages were treated for 3 and 6 h with 0.1 or 1  $\mu\text{g/ml}$  LPS, or were untreated. mRNA expression was analyzed by reverse transcription-quantitative PCR. Values represent the mean  $\pm$  SEM of three experiments. LPS, lipopolysaccharide; MIP-2, C-X-C motif chemokine 2; KC, platelet-derived growth factor-inducible protein KC; MCP-5, C-C motif chemokine 12.

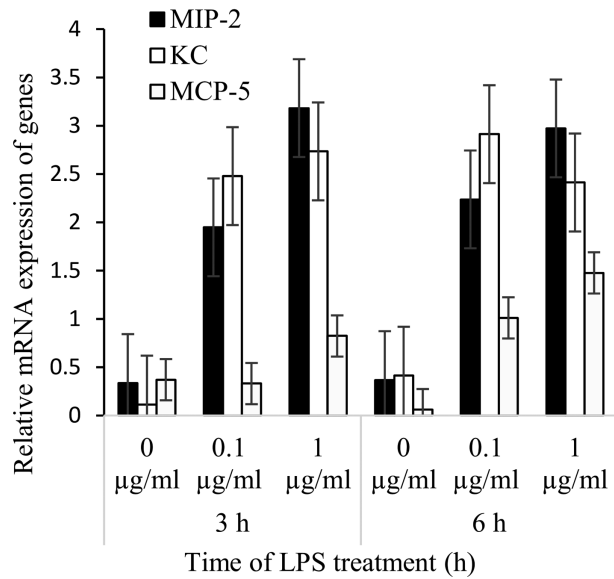

Supplement: Supplementary file 1 [file downloadSupplementary]
